# Supplementary material for: Process Intensification for an Insect Antimicrobial Peptide Elastin-Like Polypeptide Fusion Produced in Redox-Engineered Escherichia coli
Source: PubMed Central journal article supplement (PMC6610315; doi:10.3389/fbioe.2019.00150), 2019-06-27

## Supplementary Material

### Process intensification for an insect antimicrobial peptide elastin-like polypeptide fusion produced in redox-engineered *Escherichia coli*

Mathias Joachim<sup>1,2</sup>, Nicolas Maguire<sup>3</sup>, Johannes Schäfer<sup>1</sup>, Doreen Gerlach<sup>3</sup>, Peter Czermak<sup>1,2,3,\*</sup>

<sup>1</sup>Institute of Bioprocess Engineering and Pharmaceutical Technology, University of Applied Sciences Mittelhessen, Giessen, Germany

<sup>2</sup>Faculty of Biology and Chemistry, Justus Liebig University, Giessen, Germany

<sup>3</sup>Department of Bioresources of Fraunhofer Institute for Molecular Biology and Applied Ecology IME, Giessen, Germany

**\* Correspondence:**

Prof. Dr.-Ing. Peter Czermak  
peter.czermak@lse.thm.de

#### 1 Supplementary Data

The nucleic acid sequence of the The 2517-bp product (T7/lac+6xHis-ELP<sub>80</sub>-TrxB-intein-IMPI(I38V)-T7) used for bacterial transformation:

```
taatacgactcactataggggaattgtgagcggataacaattcccctctagaaataattttGTTTAACTTTAAGAAGGAGATAT
ACATatgcatcaccatcaccatcacAGGATGGTGGGAGTTCCAGGAGTCGGAGTTCCAGGTGGAGGA
GTACCTGGTTTGGGTGTTCCCTGGTGTAGGAGTCCCTGGTGTAGGTGTTCCCTGGTGTCCGA
GTACCAGGTGGAGGAGTCCCTGGATTGGGTGTTCCCTGGTGTGGTGTGCCAGGTGTGGG
AGTTCAGGTGTCCGGTGTACCTGGTGGAGGTGTTCCCTGGTTTGGGTGTACCTGGTGTCCG
TGTACCTGGTGTAGGAGTACCAGGTGTCCGAGTACCTGGAGGAGGTGTCCCTGGTTTGG
GTGTTCCCTGGAGTTGGAGTGCCAGGTGTGGGAGTTCCAGGTGTCCGAGTTCCTGGAGGT
GGTGTCCCTGGATTGGGAGTTCCTGGTGTGGAGTACCTGGAGTCGGTGTCCCGGTGTT
GGTGTTCCTGGTGGAGGTGTTCCCGGATTGGGAGTCCCTGGAGTCGGAGTGCCAGGTGT
GGGAGTTCAGGTGTGGGTGTTCCCTGGTGGTGGTGTTCCTGGACTGGGAGTACCTGGTGT
TGGTGTACCAGGTGTCCGGTGTTCCTGGCGTTGGAGTGCCTGGAGGAGGTGTTCCCTGGATT
GGGAGTACCCGGTGTGGTGTGCCAGGTGTGGGAGTTCCAGGAGTCGGAGTTCAGGTG
GAGGAGTACCTGGTTTGGGTGTTCCCTGGTGTAGGAGTCCCTGGTGTAGGTGTTCCCTGGT
TCGGAGTACCAGGTGGAGGAGTCCCTGGATTGGGTGTTCCCTGGTGTGGTGTGCCAGGT
GTGGGAGTTCAGGTGTCCGGTGTACCTGGTGGAGGTGTTCCCTGGTTTGGGTGTACCTGGT
GTCGGTGTACCTGGTGTAGGAGTACCAGGTGTCCGAGTACCTGGAGGAGGTGTCCCTGG
TTTGGGTGTTCCCTGGAGTTGGAGTGCCAGGTGTGGGAGTTCAGGTGTCCGAGTTCCTGG
AGGTGGTGTCCCTGGATTGGGAGTTCCTGGTGTGGAGTACCTGGAGTCGGTGTTCCTGG
TGTTGGTGTTCCTGGTGGAGGTGTTCCCGGATTGGGAGTCCCTGGAGTCGGAGTGCCAG
GTGTGGGAGTTCAGGTGTGGGTGTTCCCTGGTGGTGGTGTTCCTGGACTGGGAGTACCTG
GTGTTGGTGTACCAGGTGTCCGGTGTTCCTGGCGTTGGAGTGCCTGGAGGAGGTGTTCCCTG
```

GATTGGGAGTACCCGGTGTGGTGTGCCAGGTGGGCCTagtgaagcgacaaaattatccacctgacggacg  
acagtttcgacacggatgttctgaaagccgatggcgcgattctggtgacttctgggcgggaatggtgcggcccgtgtaaatgattgcaccgatcct  
ggatgaaattgctgacgaatatcagggcaaaactgaccgtggcgaaactgaacatcgatcaaaatccgggtaccgccccgaaatacggcattcgt  
ggtatcccgacgctgctgctgtttaaaaacggtgaagtgcggccaccaaaagtcggtgccctgtcaaaaggtcaactgaaagaattcctggacgc  
aaatctggcgGAGCAAGGAAGTGGAAAGTGCATTGGCAGAGGGAACAAGAATTTTTGACCCAG  
TCACCGGAACTACTCATAGAATCGAAGATGTCGTTGGAGGAAGAAAGCCAATTCATGTT  
GTCGCTGCCGCAAAGATGGAACATTGCACGCTAGACCTGTTGTCTCATGGTTTGATCA  
AGGAACTAGAGACGTTATTGGTCTTAGAATCGCAGGTGGAGCTATCTTGTGGGCTACCC  
CAGATCATAAGGTCTTGACTGAATACGGTTGGAGAGCTGCCGGAGAGTTGAGAAAAGGT  
GACAGAGTTGCTCAACCTAGAAGATTTGATGGTTTTCGGAGACTCTGCCCAATTCCTGCA  
AGAGTTCAGGCATTGGCTGATGCCCTTGATGACAAGTTTTTGCACGACATGCTTGCTGAA  
GAGTTGAGATATTCCGTCATCAGAGAAGTTCTTCCAAGTAGAAGAGCTAGAACATTCGG  
ATTGGAAGTCGAAGAGTTGCATACTCTTGTGGCCGAGGGTGTTCGTTTACAACggaagtat  
tgtgctgattgtaacggtggcagcaataactacgaatgtggcggtgcttgcgataatgtctgtgctgatctgcatatccaaaacaaaaccaactgcc  
cgatcatcaacgtcggtgtaacgataaatgctactgtgaagatggctacgcgcgcgacgtgaatggtaaatgcattccgatcaagactgtccga  
aaatccgtagctaattgggtaattgattaatacctaggctgctaaacaaagcccgaaggaagctgagttggctgctgccaccgctgagcaataact  
agcataacccttggggcctctaaacgggtcttgaggggtttttg

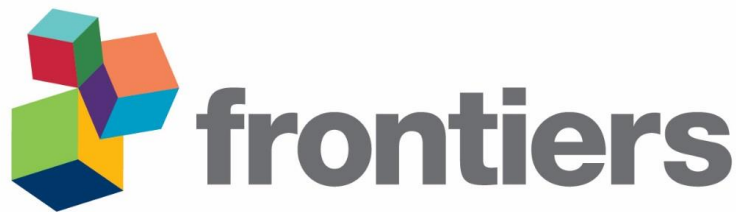

Supplement: Data_Sheet_1.pdf [file Data_Sheet_1.pdf]
